# Supplementary material
Source: publisher figshare collection journal article supplement (https://acs.figshare.com/ndownloader/files/12767771)

# TEMPO-catalyzed Direct Conversion of Primary Alcohols to $\alpha$ -Chloroacetals with TCCA Both as an Oxidant and a Chlorination Reagent

Guangyuan Feng,<sup>a</sup> Suliu Feng,<sup>\*b</sup> Lei Liu,<sup>\*c</sup> Haitang Du<sup>d</sup> and Chunbao Li<sup>\*a</sup>

<sup>a</sup>Department of Chemistry, School of Science, Tianjin University, 135 Yaguan Road, Jinnan District, Tianjin 300354, China.

<sup>b</sup>Jiangsu Youjia Crop Protection Co. Ltd, Fifth Tonghai Road, Coastal Economic Development Zone of Rudong County, Jiangsu 226400, China.

<sup>c</sup>Tianjin Key Laboratory of Molecular Design and Drug Discovery, Tianjin Institute of Pharmaceutical Research, Tianjin 300193, China.

<sup>d</sup>Department of Chemistry Materials and Engineering, Guiyang College, Guiyang 550000, China.

## Contents

<sup>1</sup>H NMR and <sup>13</sup>C NMR spectra for **1a-1p** and **2a-2d**

**$^1\text{H}$  NMR and  $^{13}\text{C}$  NMR spectra for 1a-1p and 2a-2d**

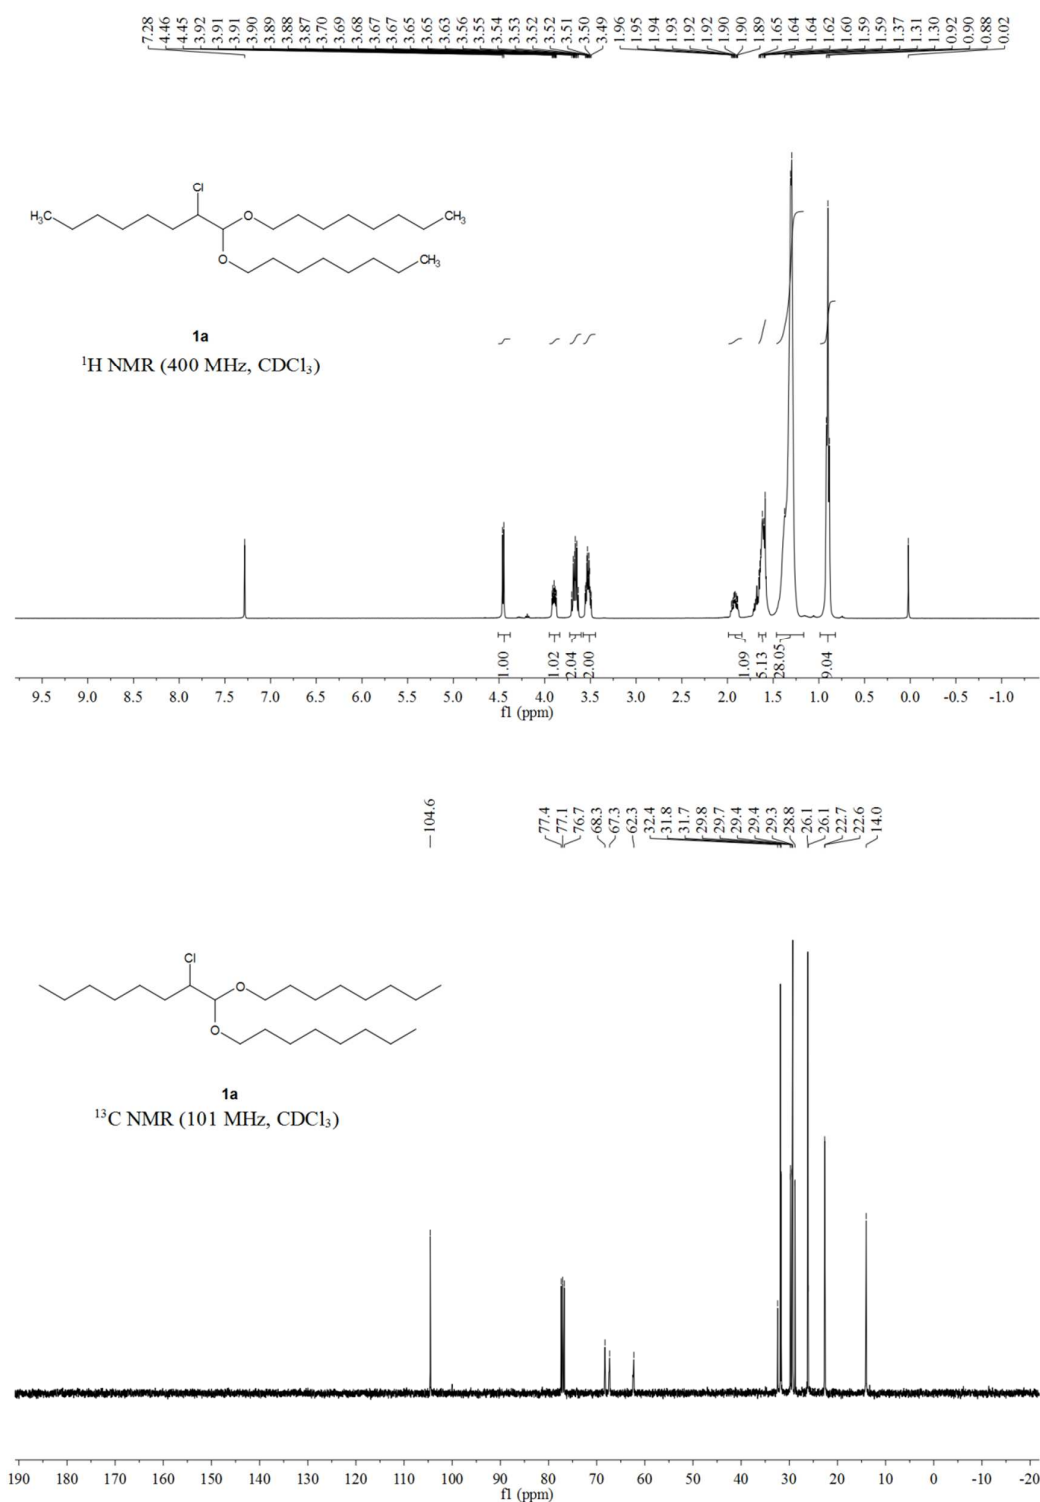

**Figure S1. NMR spectra of 1a**

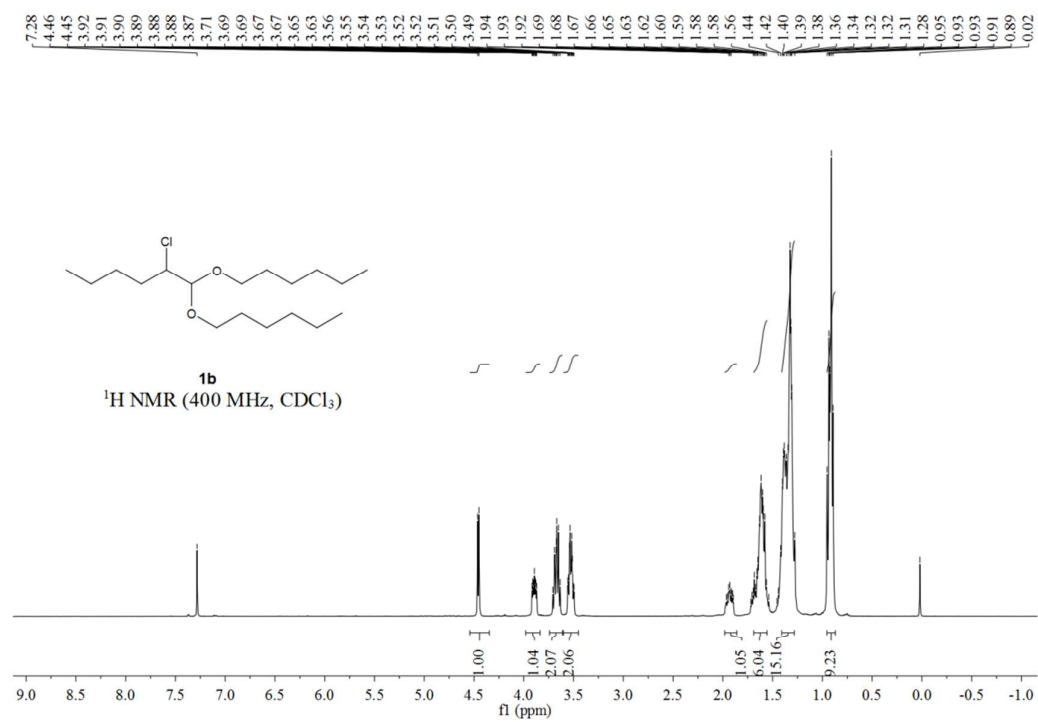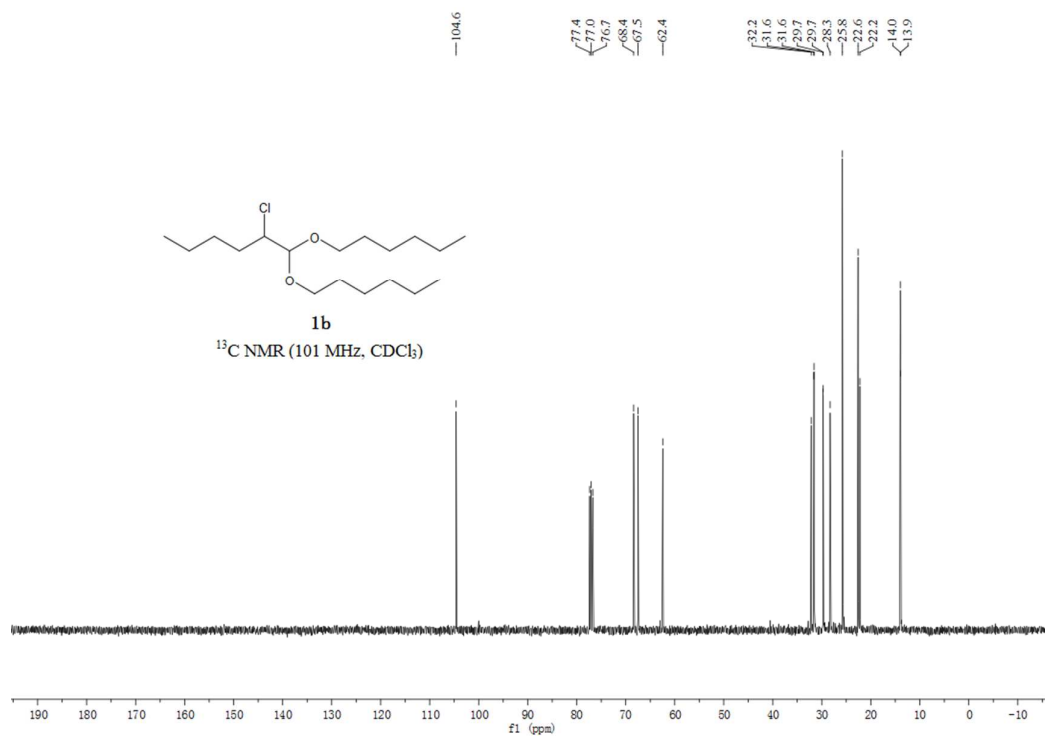

**Figure S2.** NMR spectra of **1b**

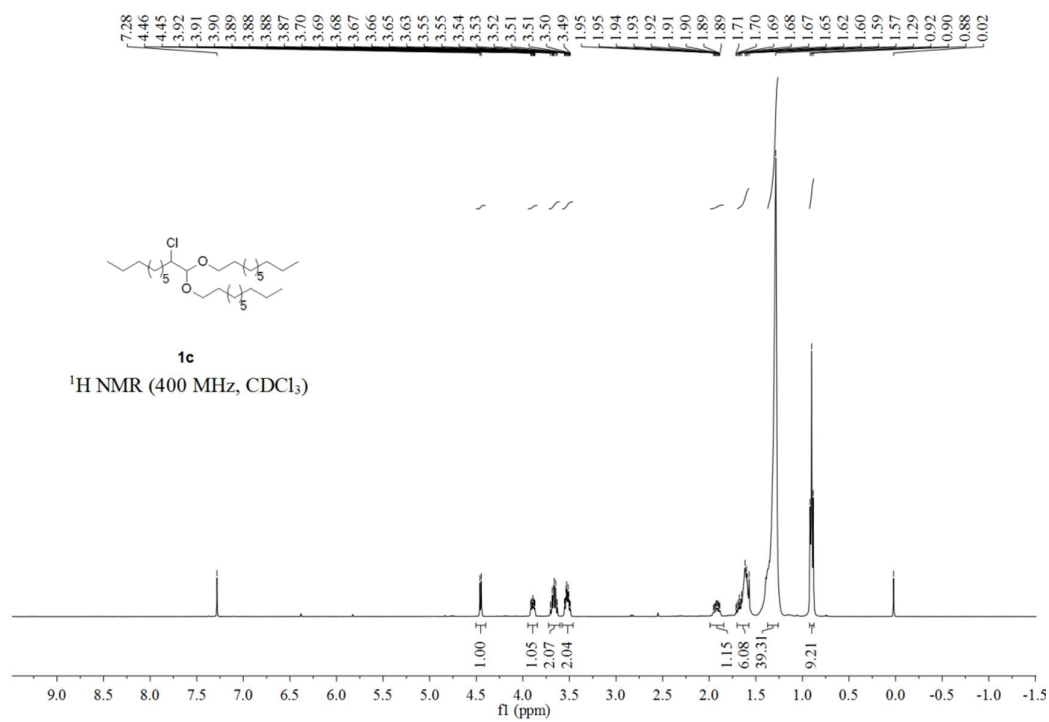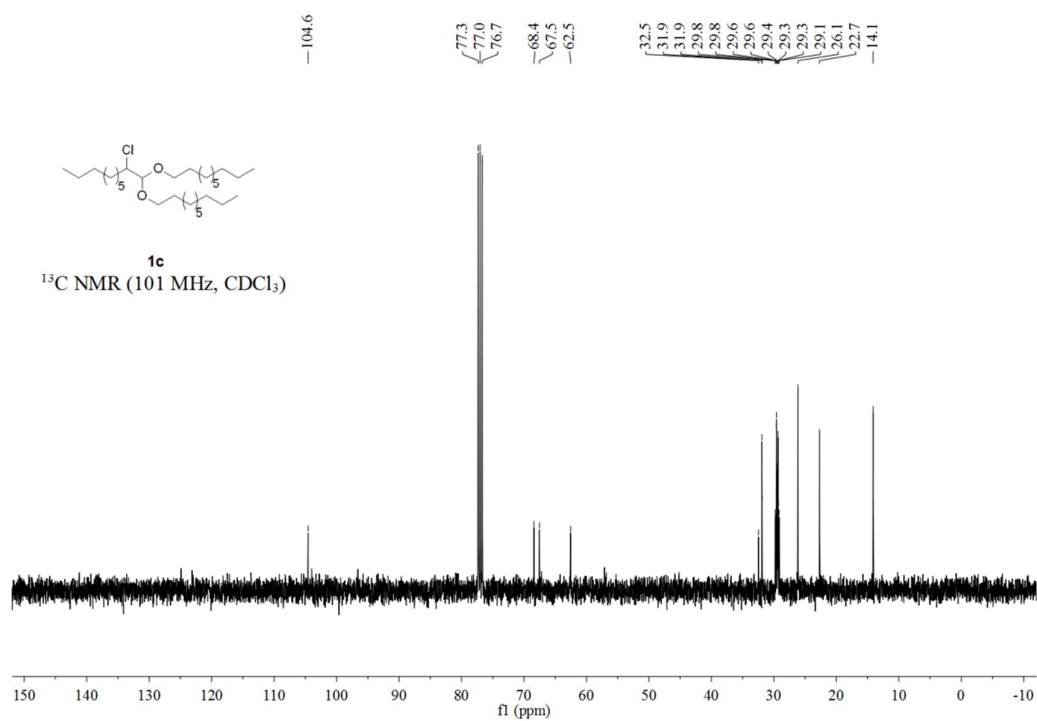

**Figure S3.** NMR spectra of **1c**

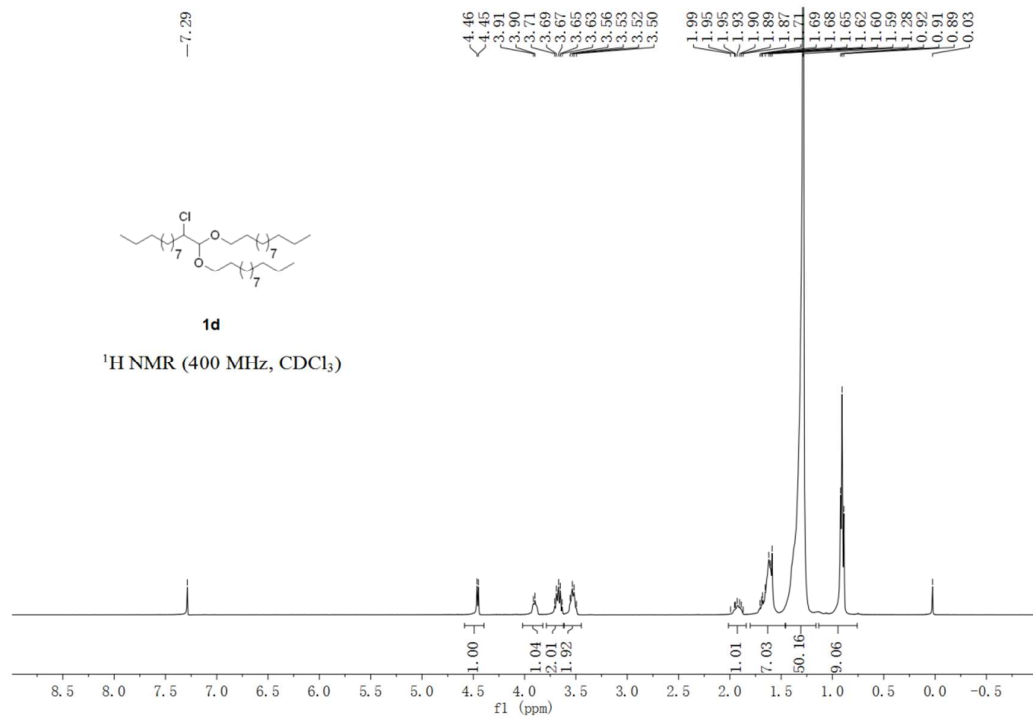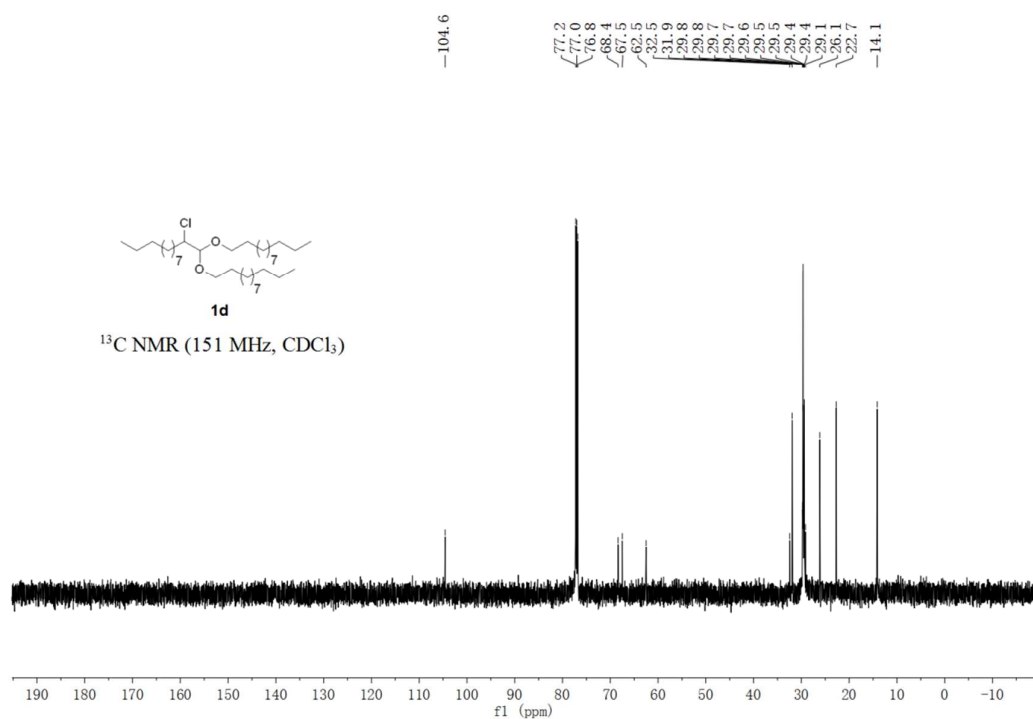

**Figure S4.** NMR spectra of **1d**

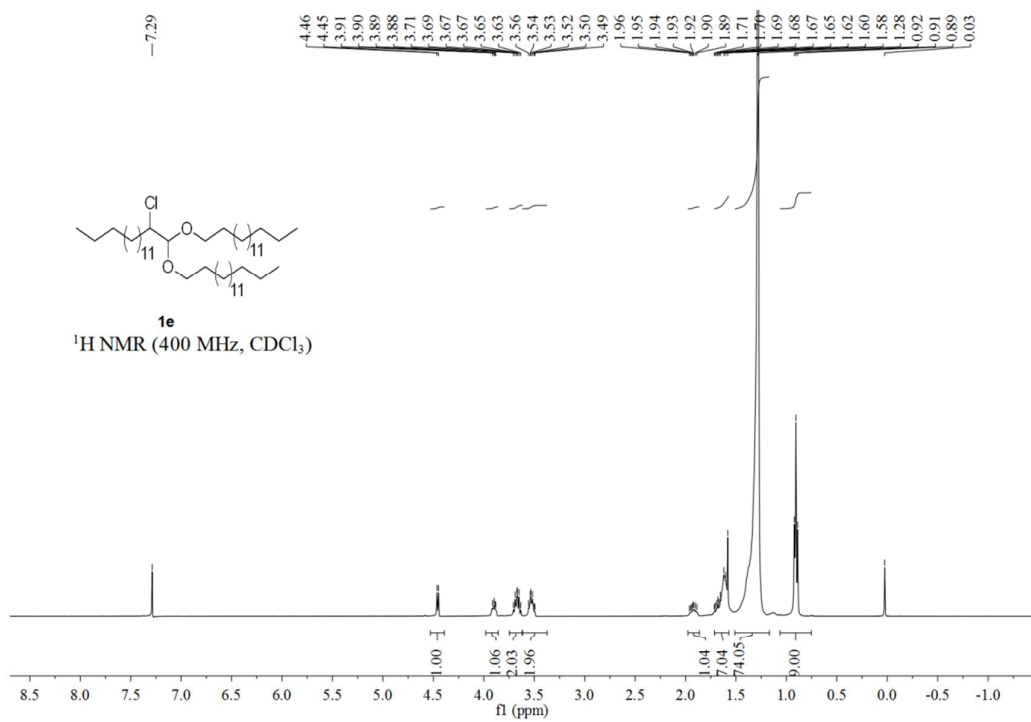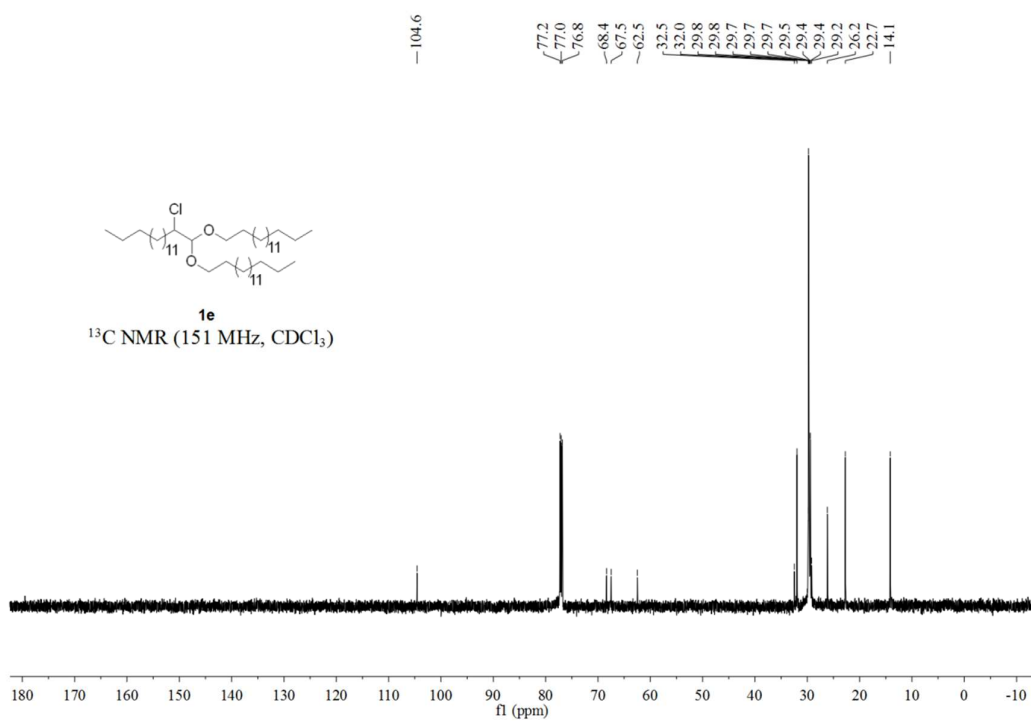

Figure S5. NMR spectra of **1e**

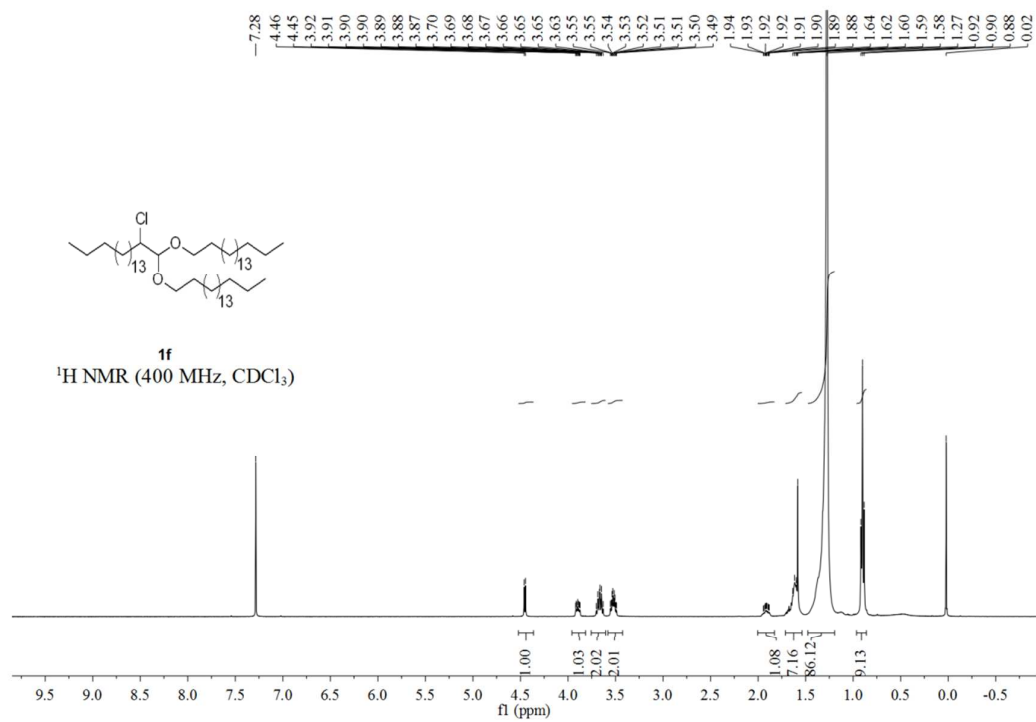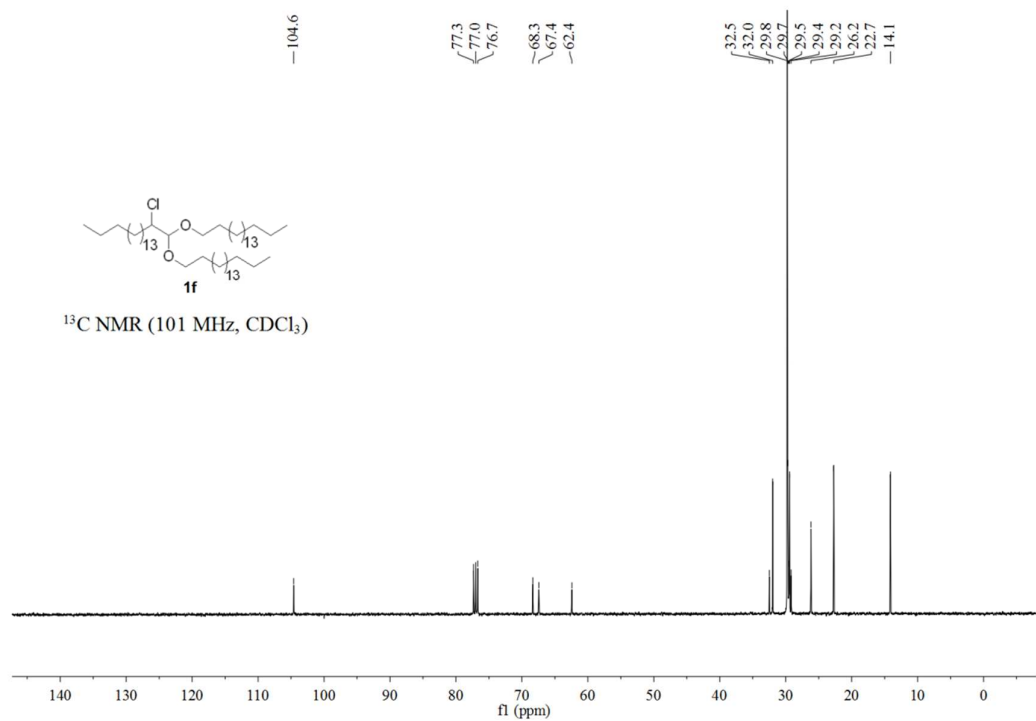

Figure S6. NMR spectra of **1f**

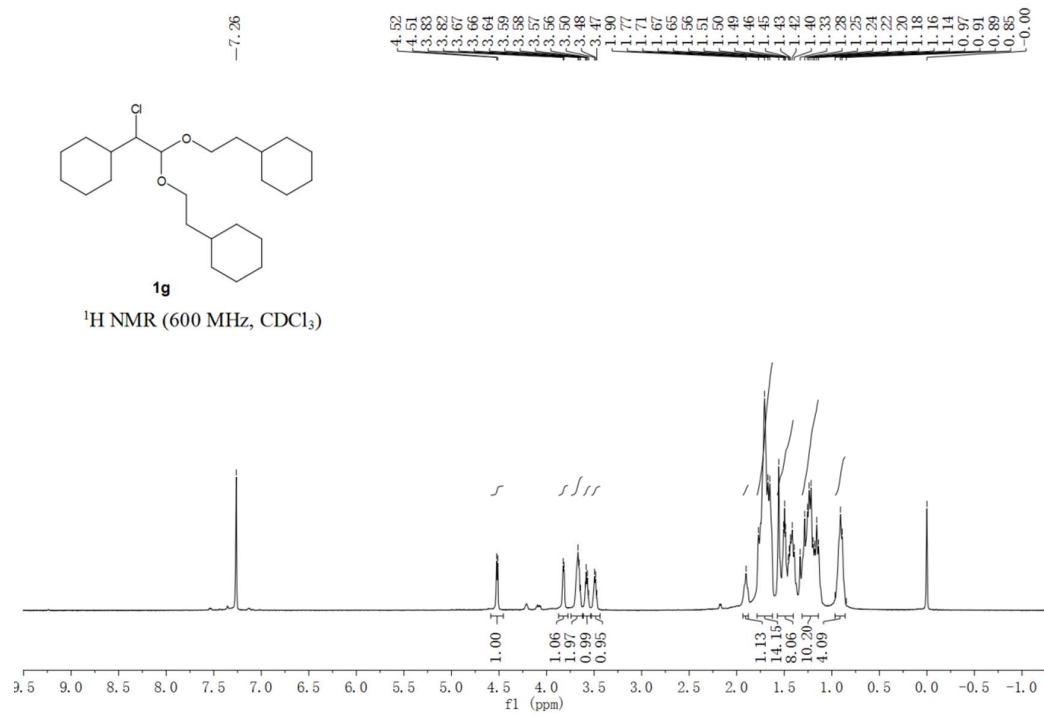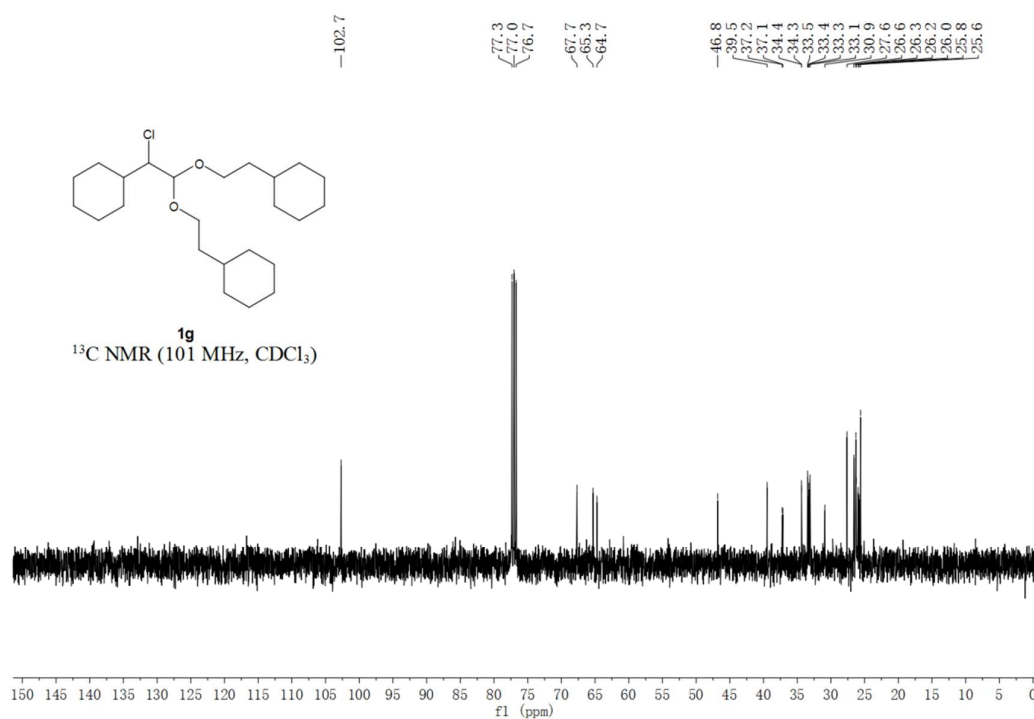

**Figure S7.** NMR spectra of **1g**



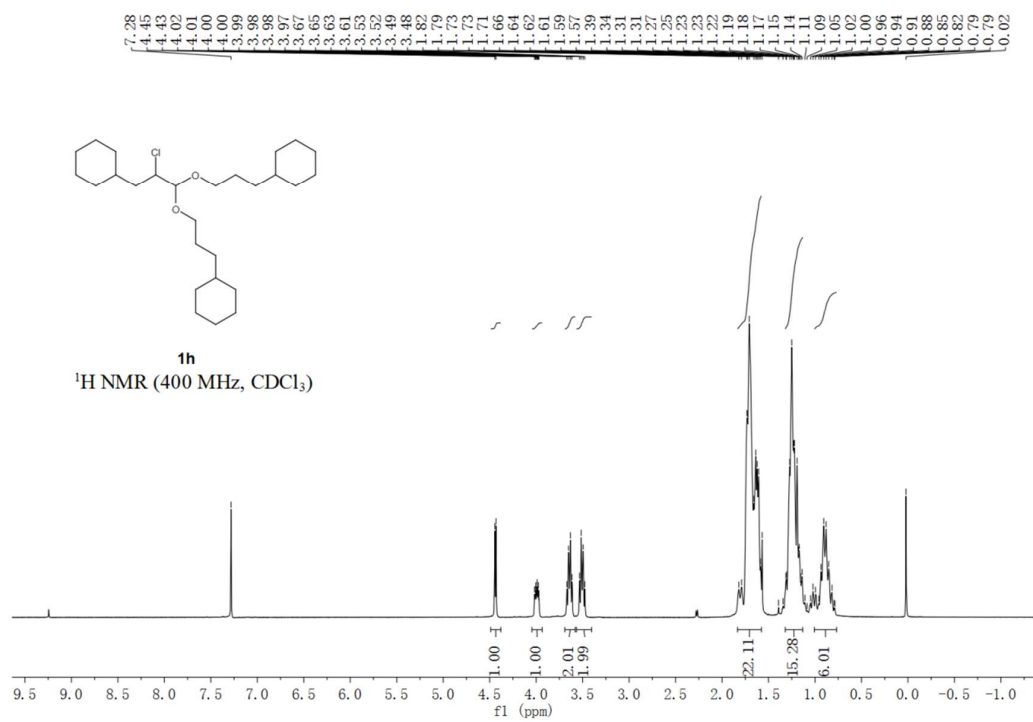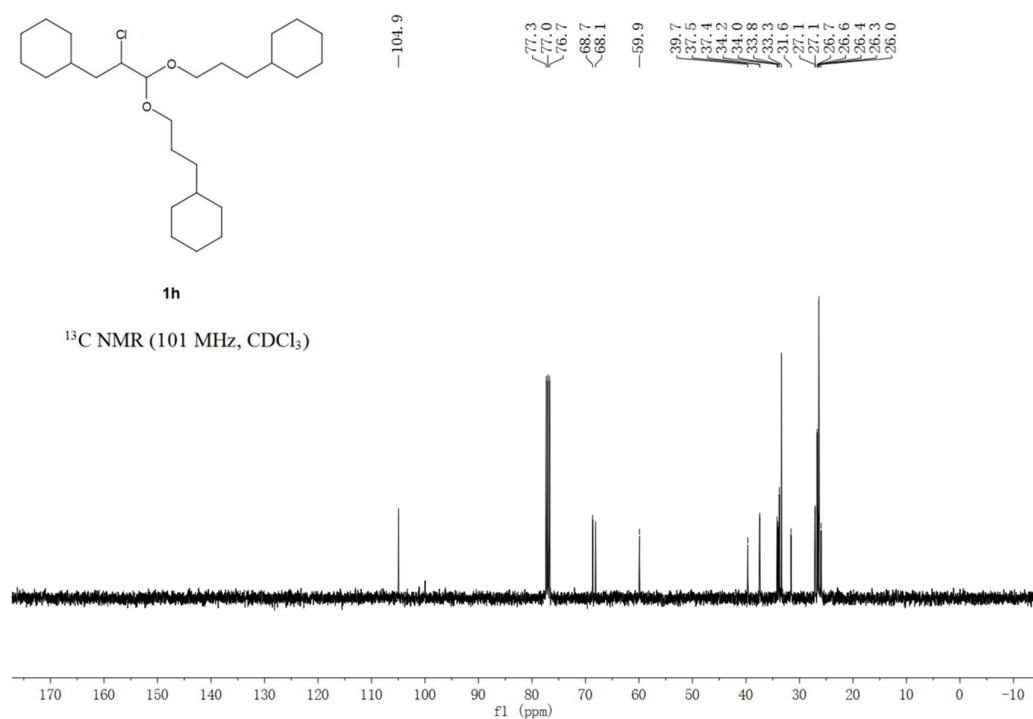

Figure S8. NMR spectra of **1h**

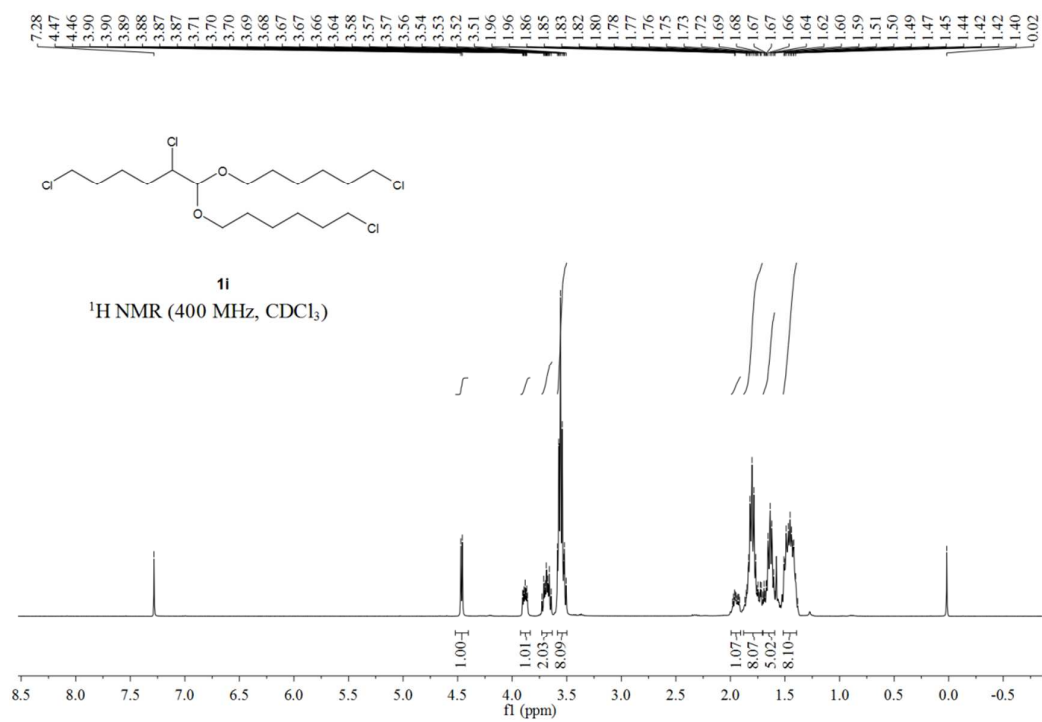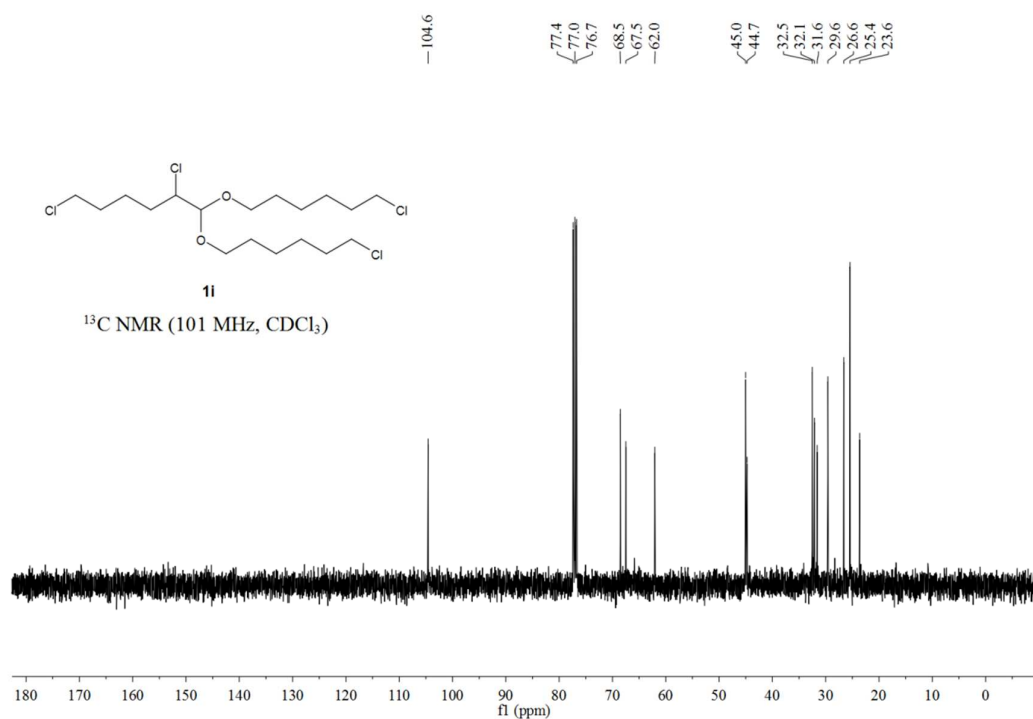

Figure S9. NMR spectra of **1i**

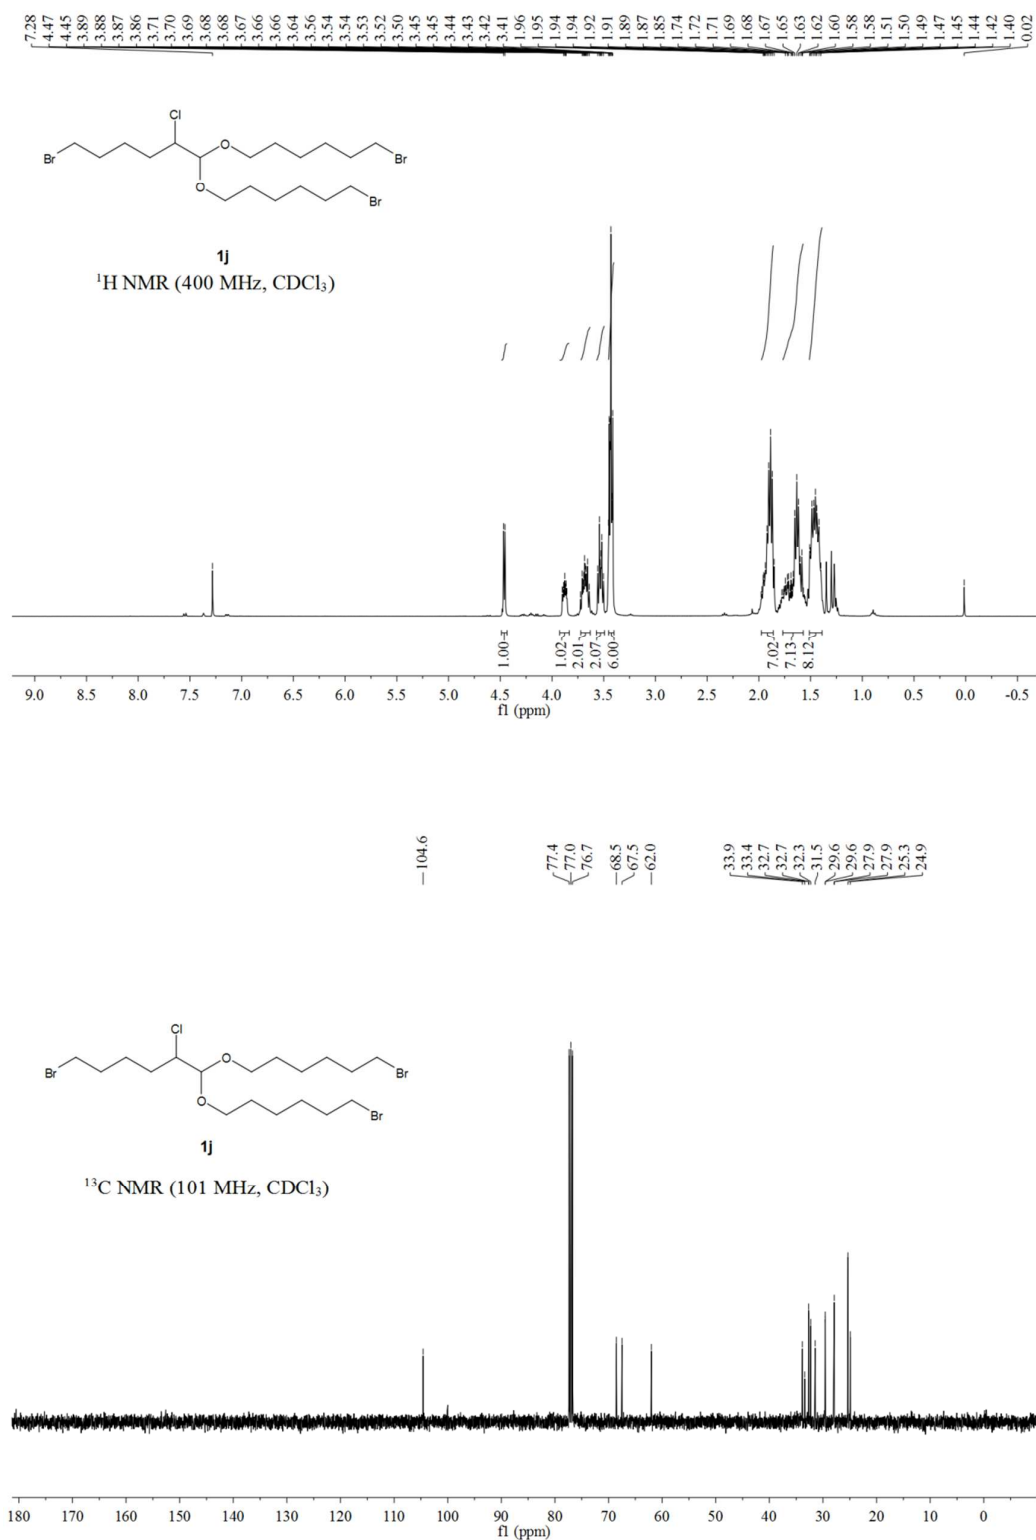

**Figure S10.** NMR spectra of **1j**

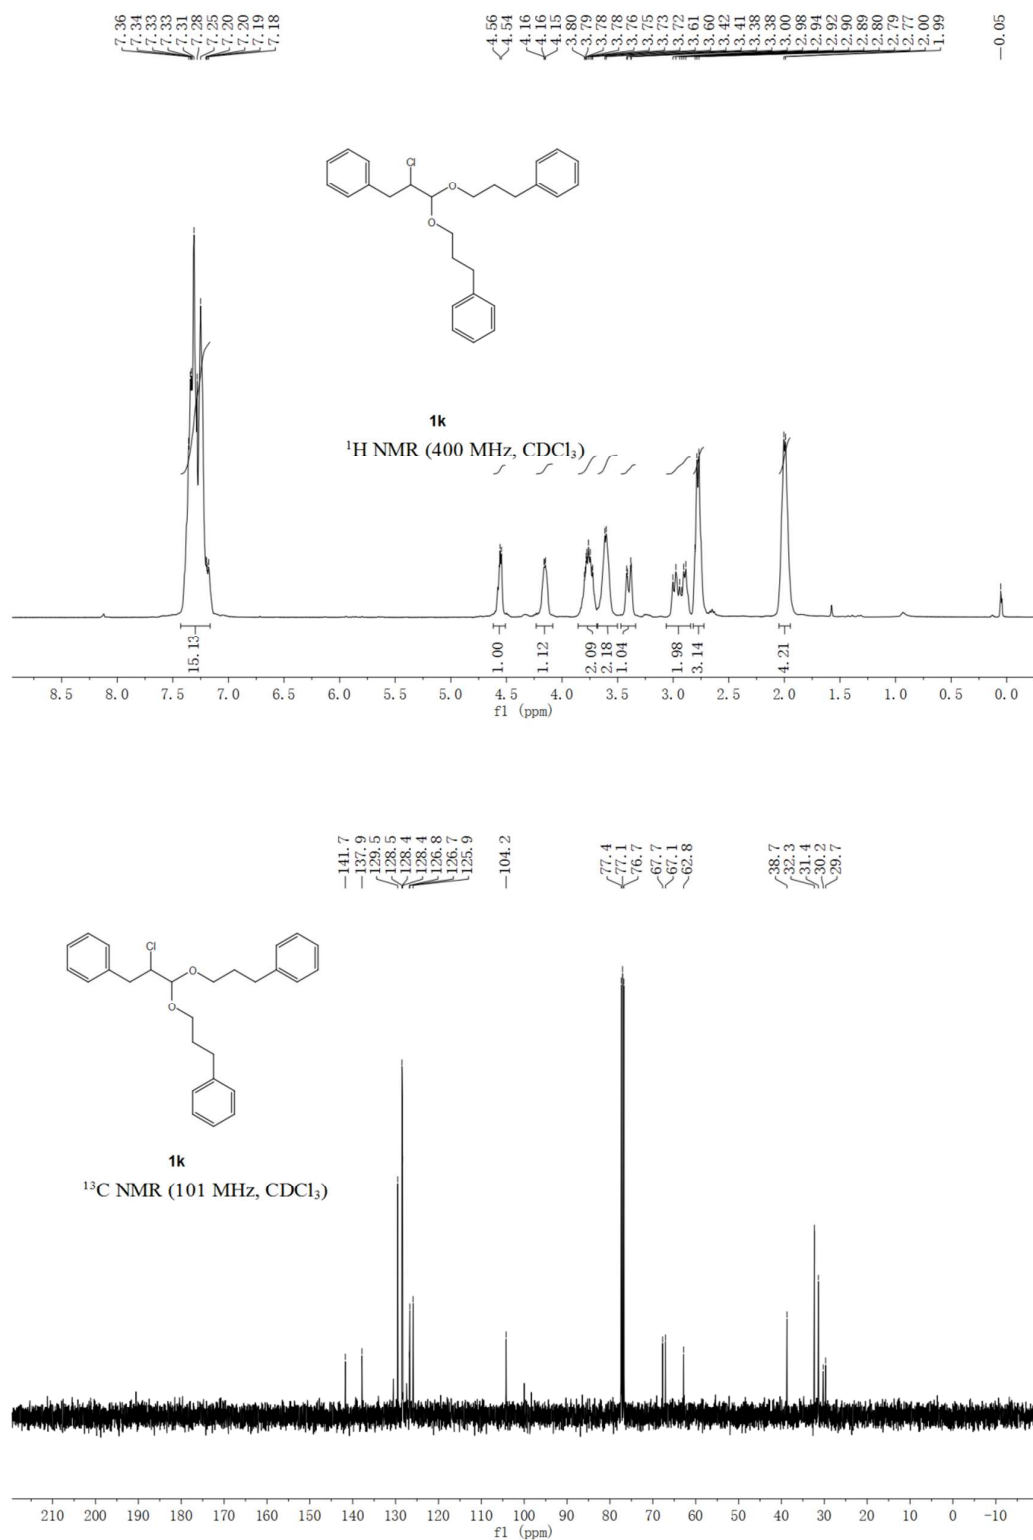

**Figure S11.** NMR spectra of **1k**

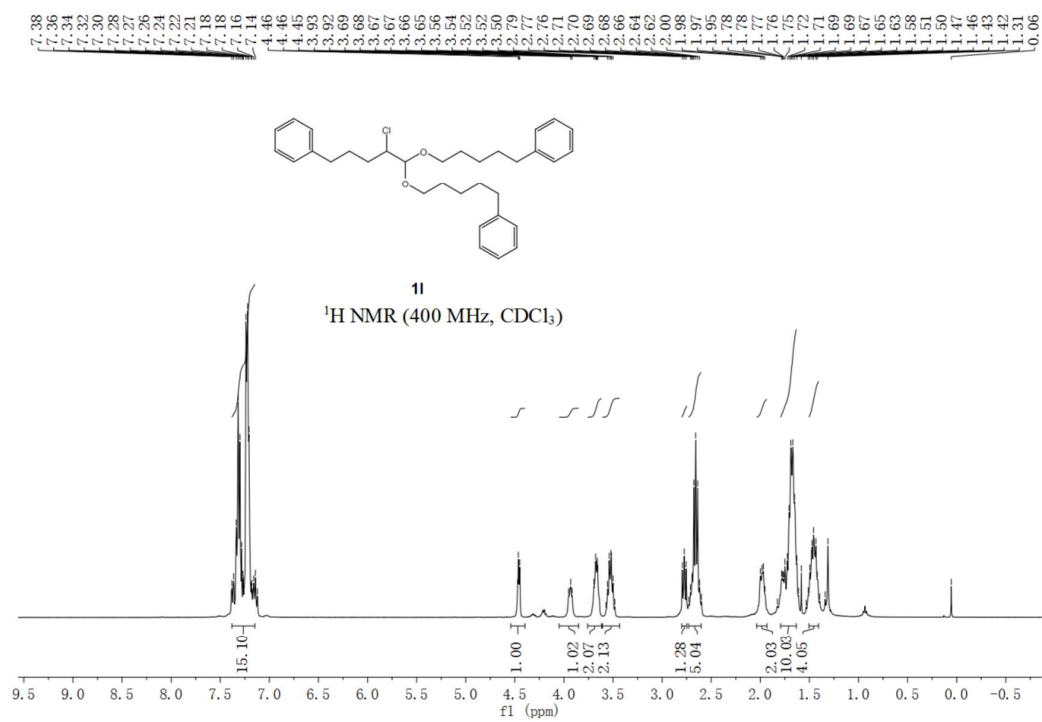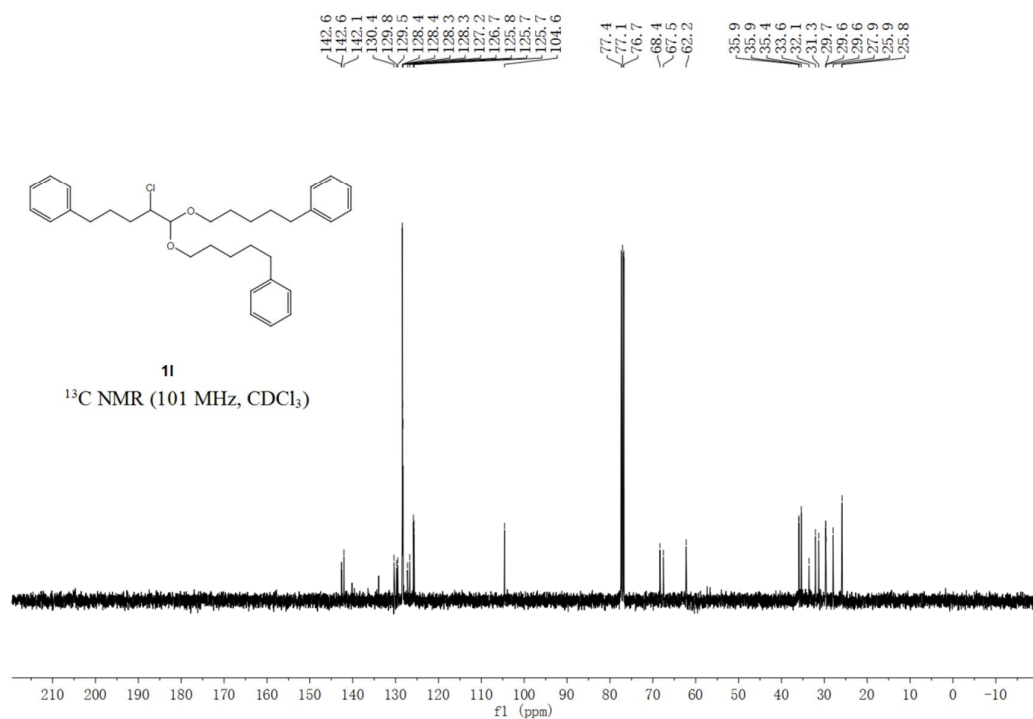

Figure S12. NMR spectra of **11**

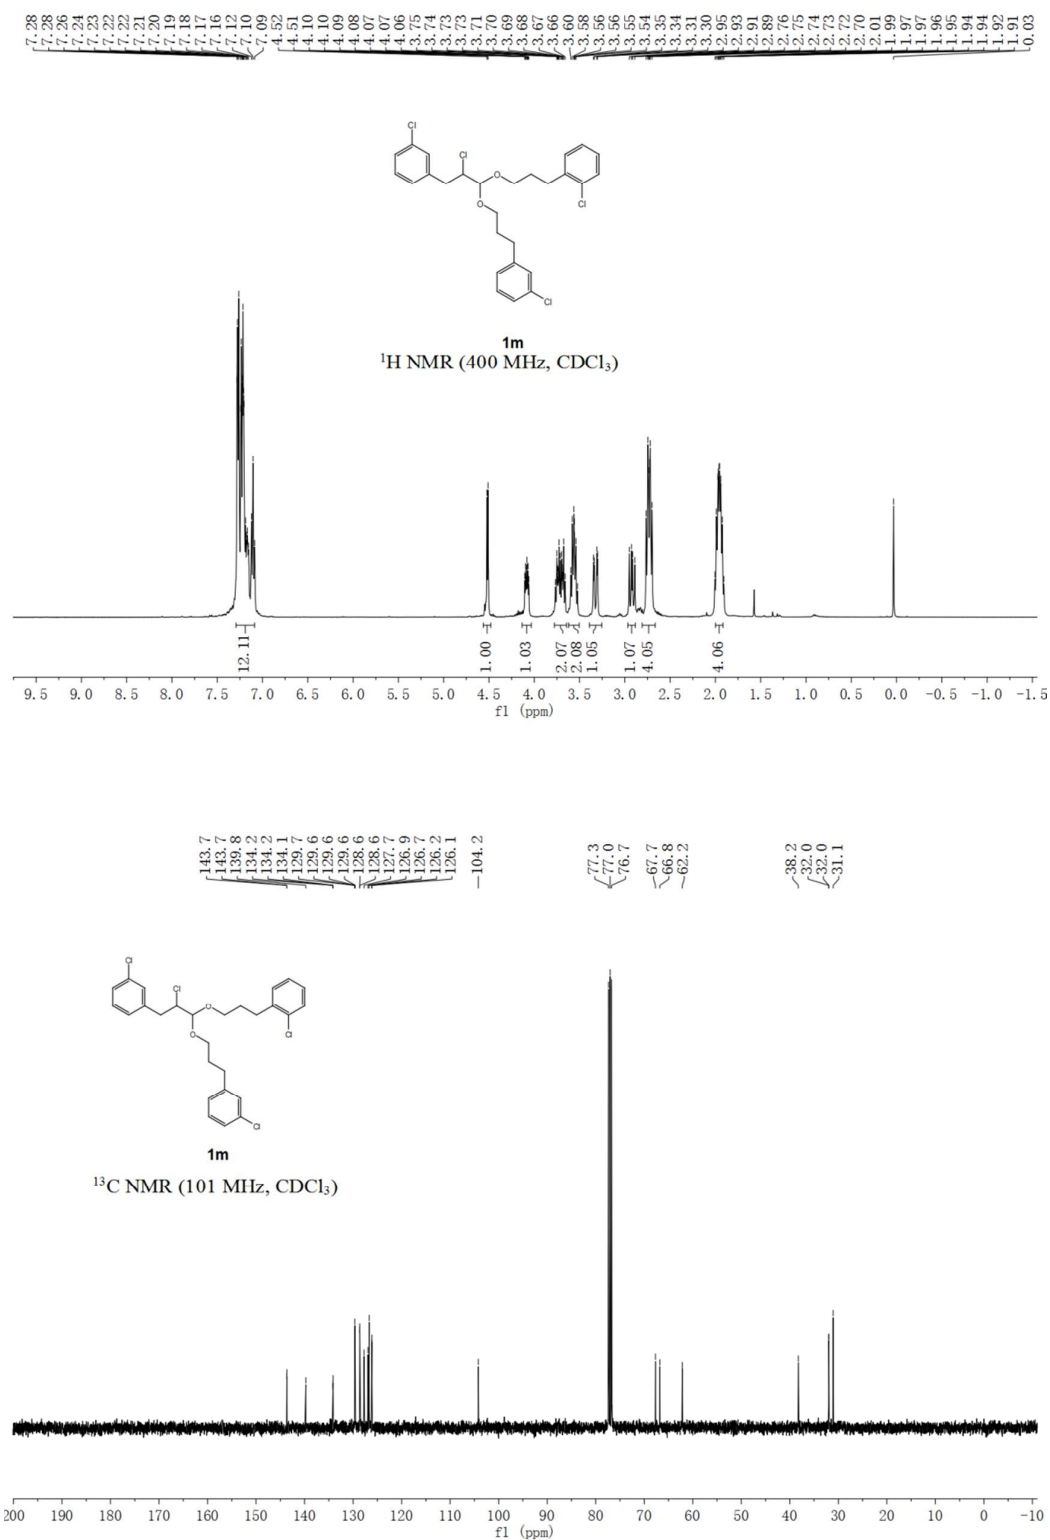

Figure S13. NMR spectra of **1m**

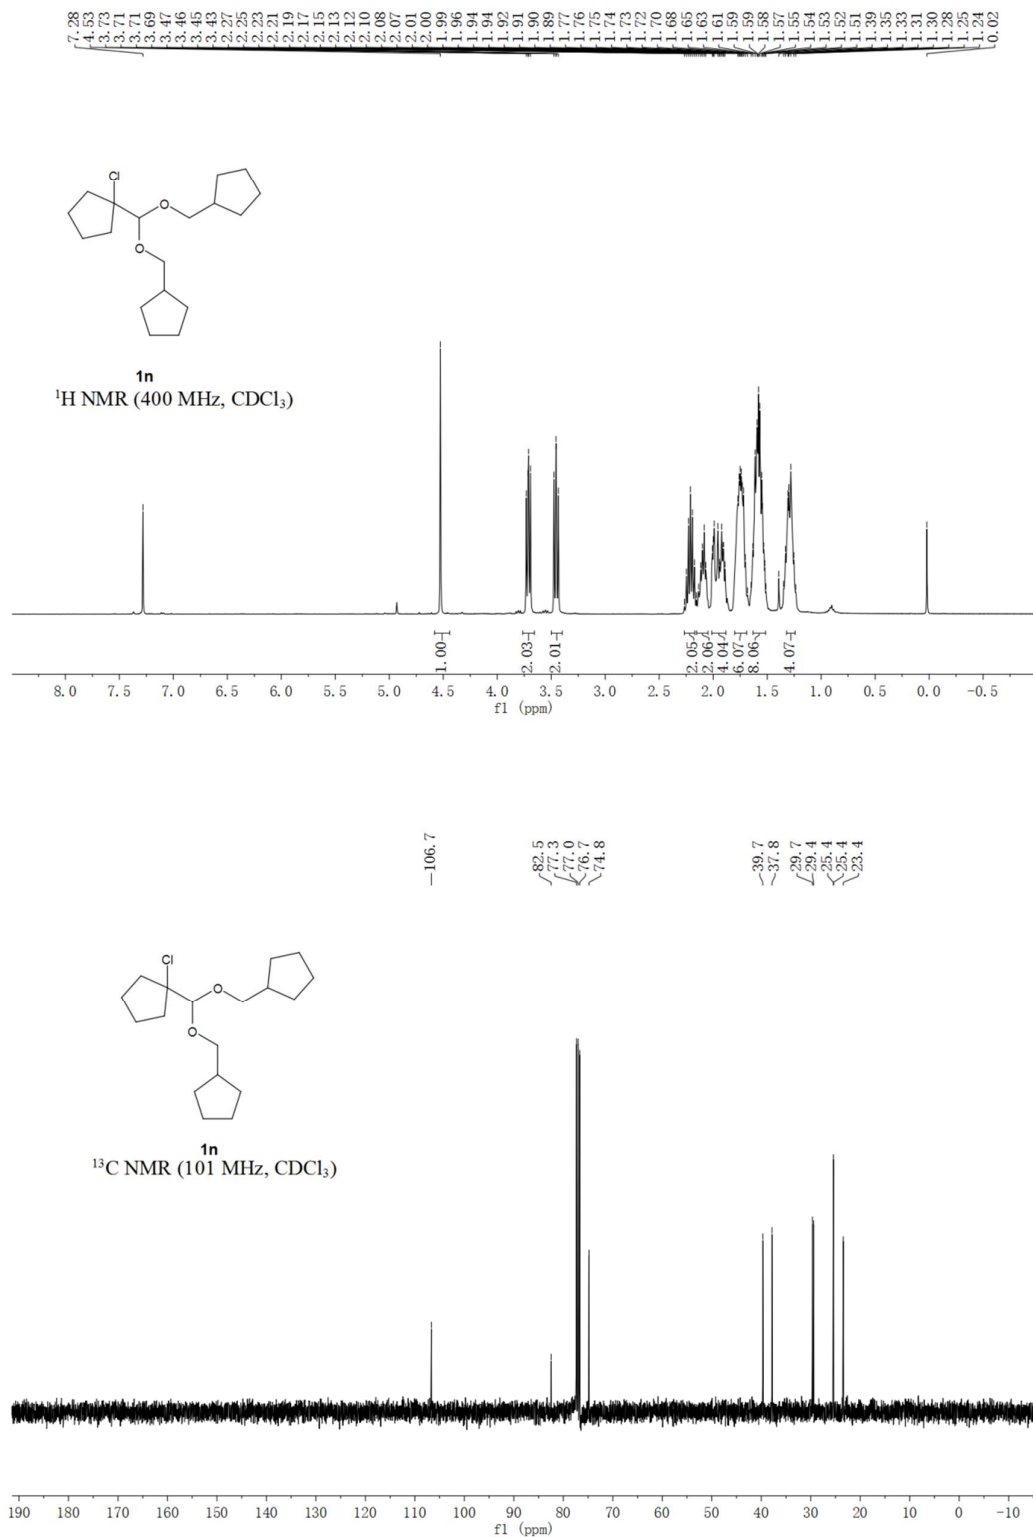

**Figure S14.** NMR spectra of **1n**

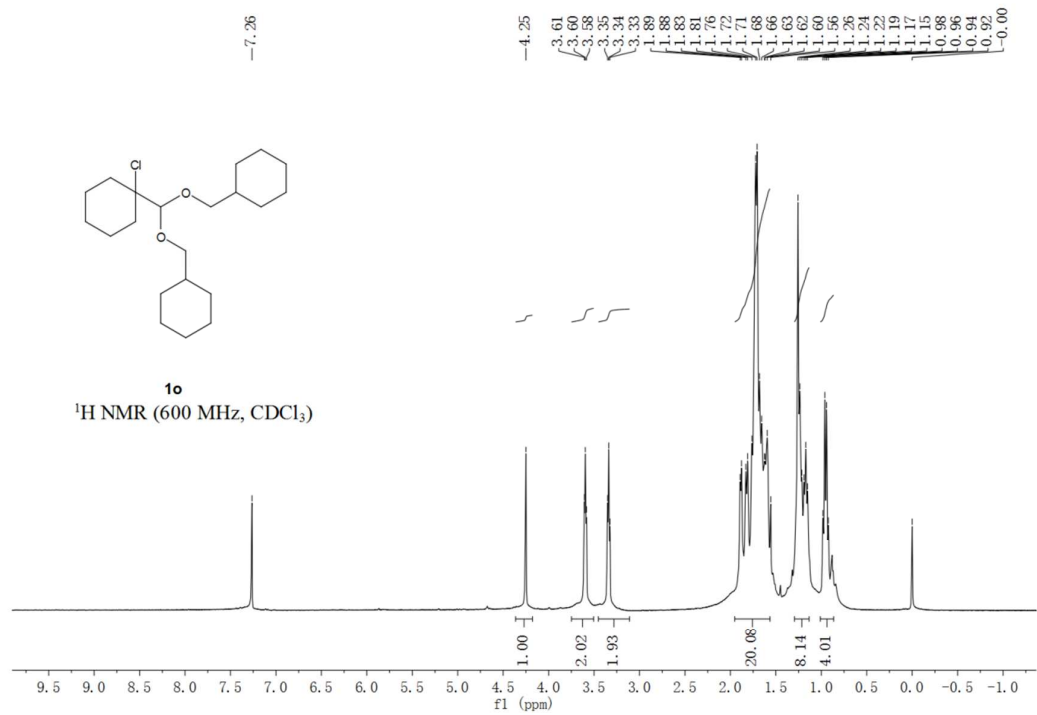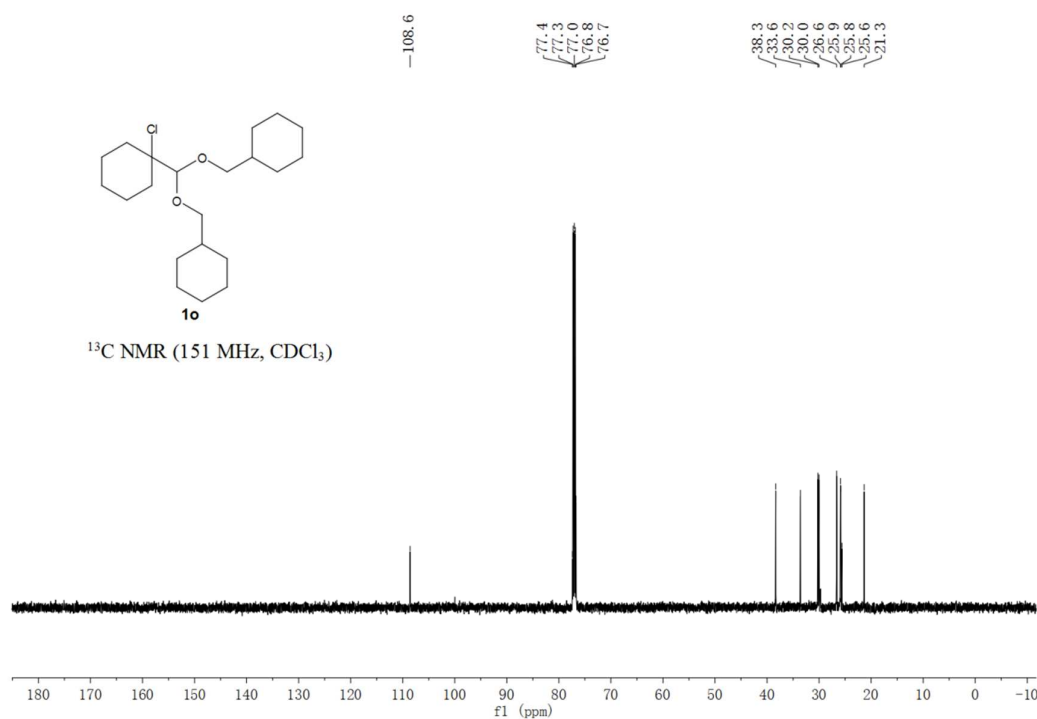

**Figure S15.** NMR spectra of **1o**



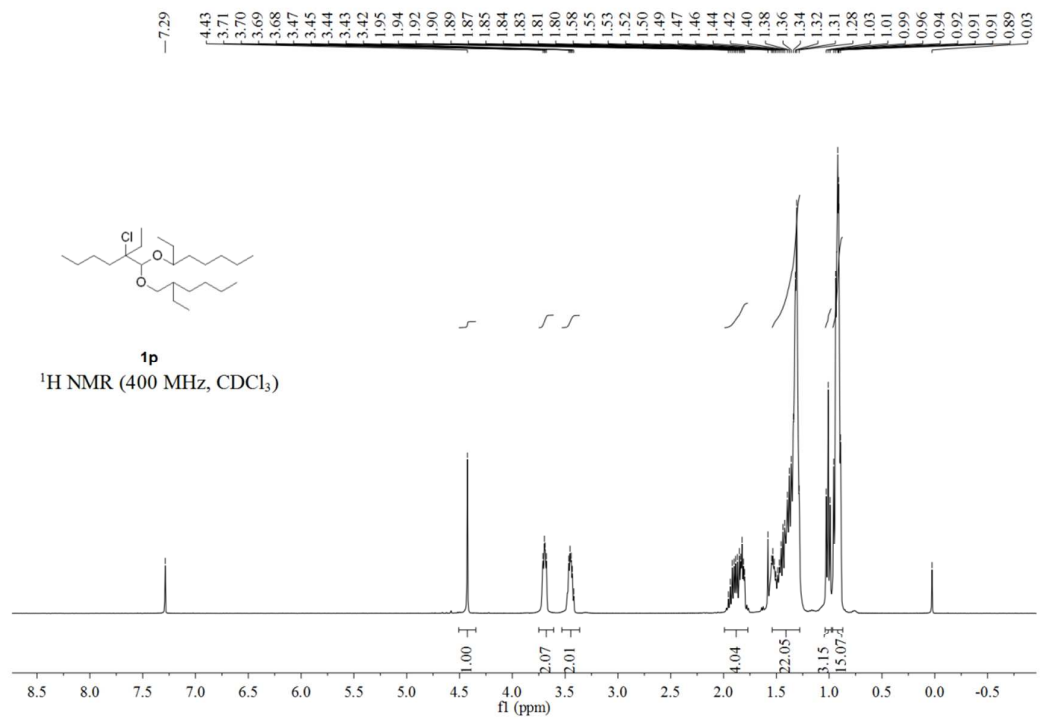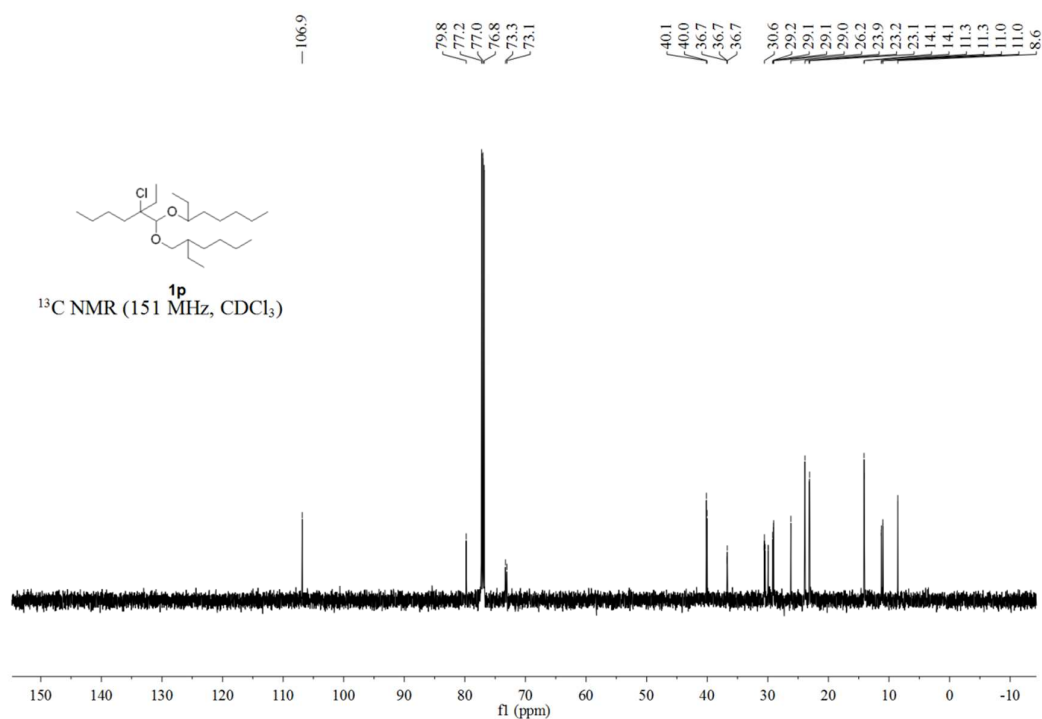

**Figure S16.** NMR spectra of **1p**



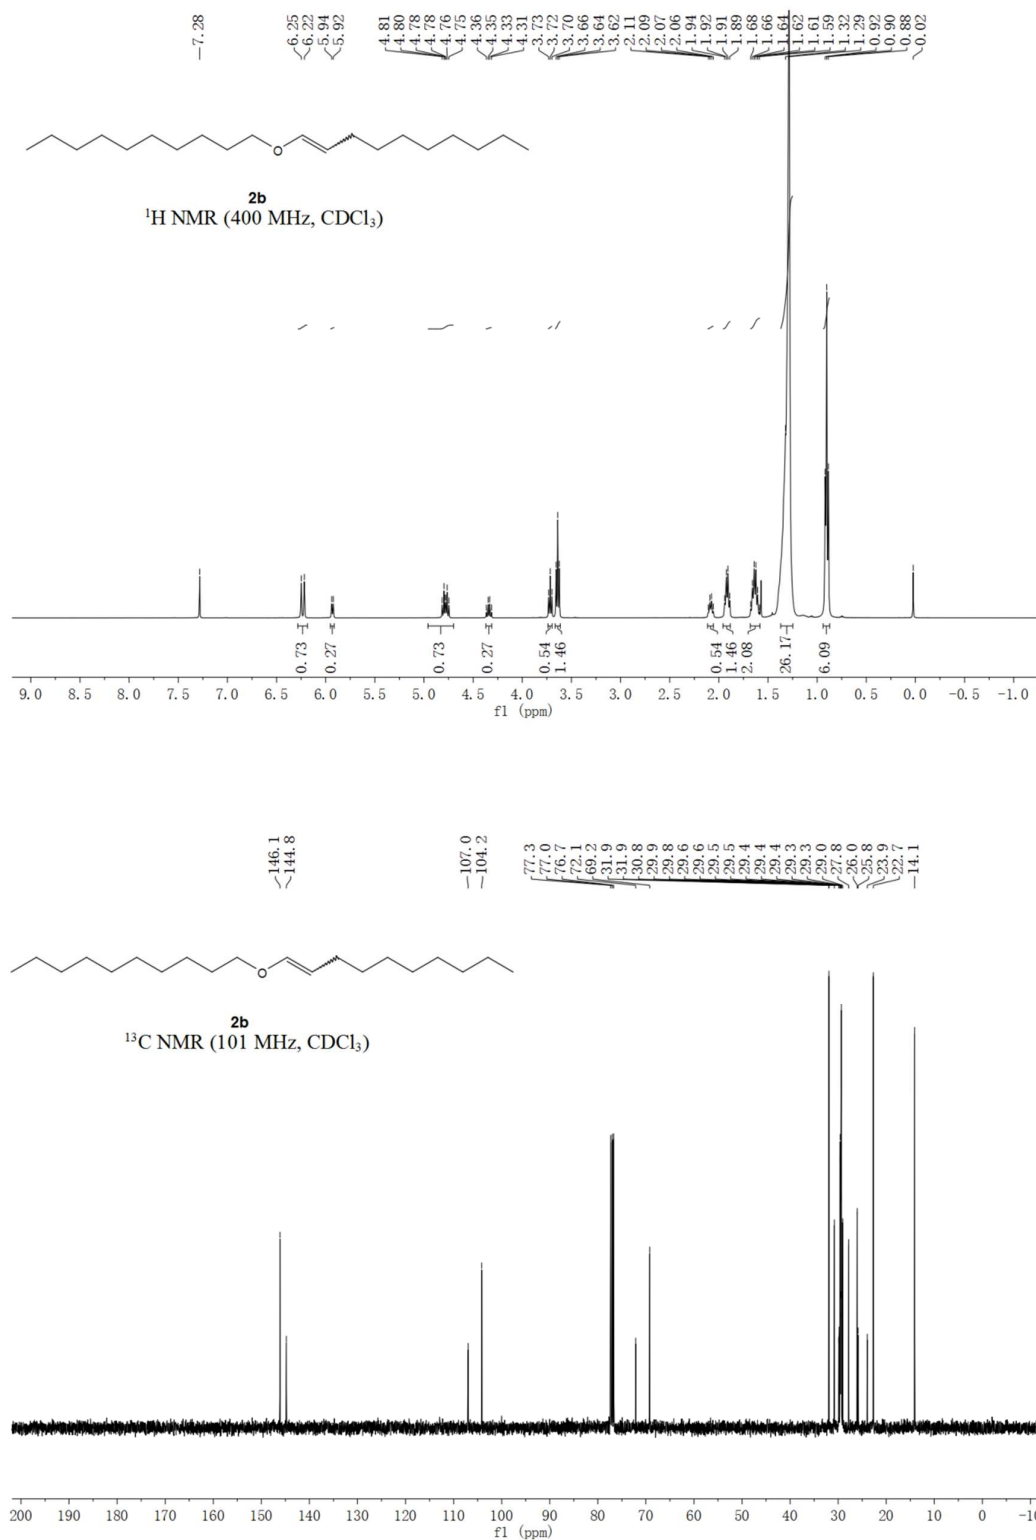

**Figure S18.** NMR spectra of **2b**

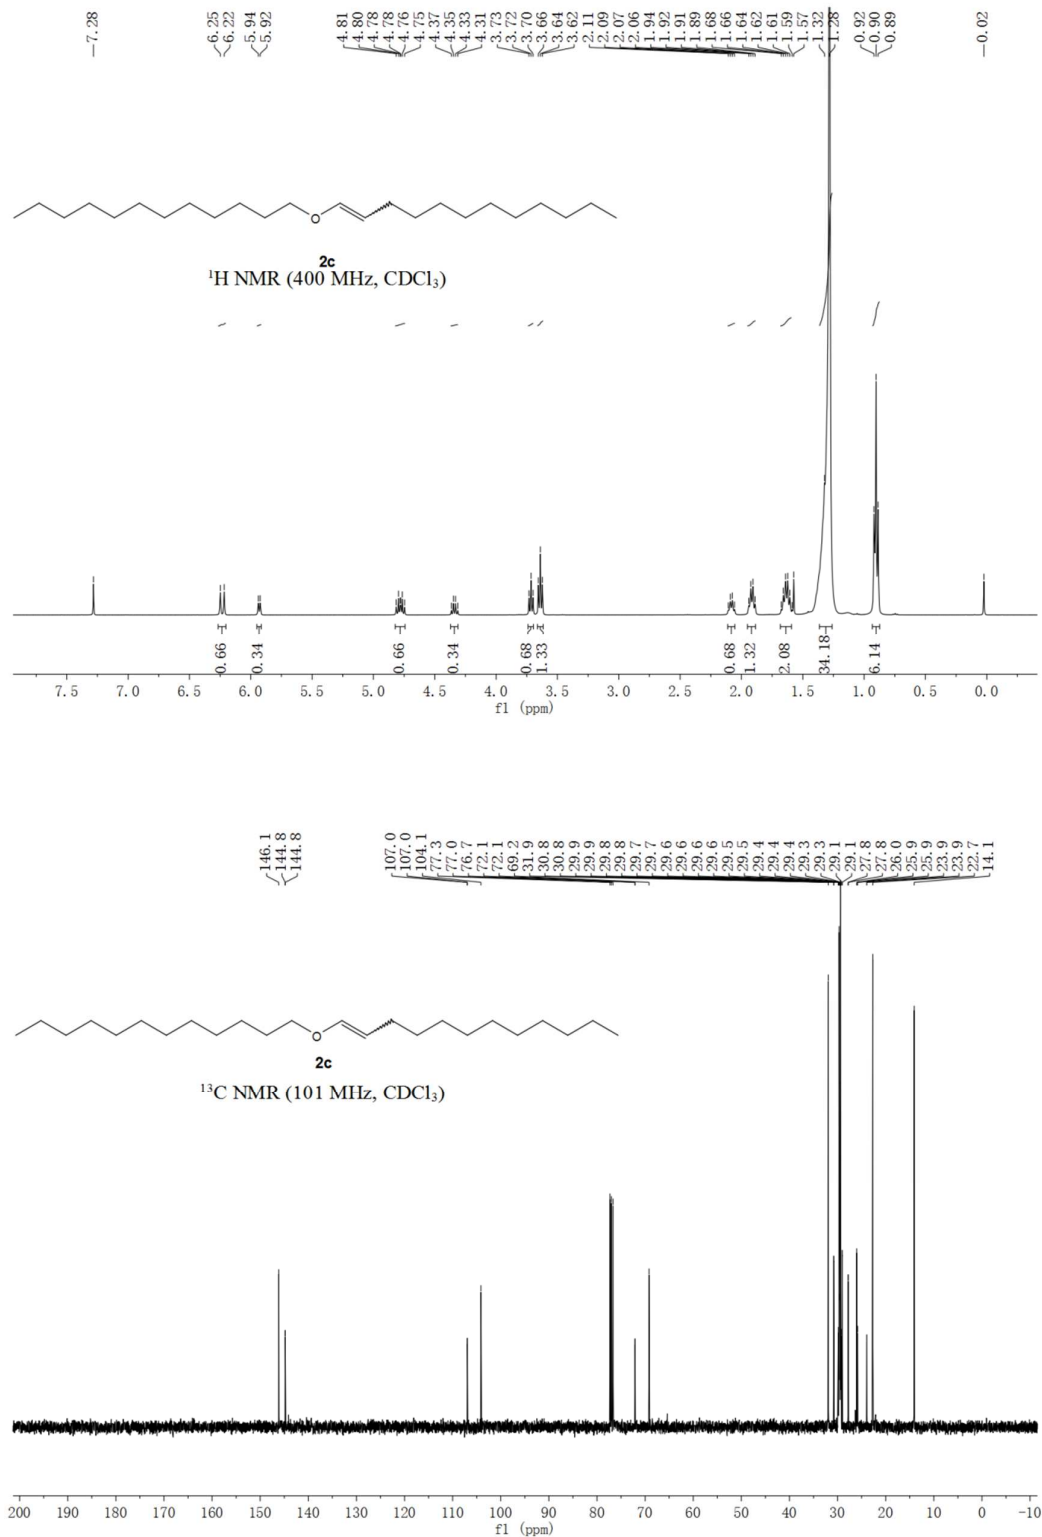

Figure S19. NMR spectra of **2c**

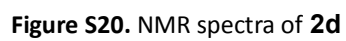

Supplement: Supplementary file 1 [file 12767771]
